# Supplementary material for: Omega-3 Fatty Acids Survey in Men under Active Surveillance for Prostate Cancer: from Intake to Prostate Tissue Level
Source: MDPI journal article supplement (doi:10.3390/nu11071616), 2019-07-16
Supplement: s1 [file s1]

**Table S1: Characteristics of excluded and included participants**

| Variable                              | Included participants<br>(n= 157) | Excluded participants<br>(n= 19) | p-value* |
|---------------------------------------|-----------------------------------|----------------------------------|----------|
| <b>Age (y)</b>                        |                                   |                                  | 0.03     |
| Mean $\pm$ SD                         | 61.29 $\pm$ 7.41                  | 65.05 $\pm$ 5.99                 |          |
| <b>Waist circumference (cm)</b>       |                                   |                                  | 0.71     |
| Mean $\pm$ SD                         | 96.04 $\pm$ 10.25                 | 95.00 $\pm$ 11.83                |          |
| <b>PSA (ng/ml)</b>                    |                                   |                                  | 0.16     |
| Mean $\pm$ SD                         | 5.04 $\pm$ 2.71                   | 4.05 $\pm$ 1.97                  |          |
| <b>Education level, n (%)</b>         |                                   |                                  | 0.43     |
| Secondary school or less              | 45 (28.85)                        | 5 (33.33)                        |          |
| Postsecondary diploma                 | 45 (28.85)                        | 2 (13.33)                        |          |
| University degree                     | 66 (42.31)                        | 8 (53.33)                        |          |
| <b>Smoking status, n (%)</b>          |                                   |                                  | 0.63     |
| Current smoker                        | 10 (6.41)                         | 1 (6.25)                         |          |
| Former smoker                         | 87 (55.77)                        | 7 (43.75)                        |          |
| Never                                 | 59 (37.82)                        | 8 (50.00)                        |          |
| <b>BMI, n (%)</b>                     |                                   |                                  | 0.70     |
| < 25                                  | 44 (28.21)                        | 5 (35.71)                        |          |
| 25 – 30                               | 76 (48.72)                        | 7 (50.00)                        |          |
| > 30                                  | 36 (23.08)                        | 2 (14.29)                        |          |
| <b>Physical activity score, n (%)</b> |                                   |                                  | 0.30     |
| Active                                | 94 (59.87)                        | 5 (38.46)                        |          |
| Moderately active                     | 13 (8.28)                         | 2 (15.38)                        |          |
| Inactive                              | 50 (31.85)                        | 6 (46.15)                        |          |

\* p-values were obtained by using the Wilcoxon test for continuous variables and chi-2 test for categorical variables.

**Table S2. Correlations between fatty acid intake, fatty acid profiles of RBC membranes and of prostate tissue.**

| Fatty acid                                               | Intake vs RBC |         | Intake vs prostate |         | RBC vs prostate |         |
|----------------------------------------------------------|---------------|---------|--------------------|---------|-----------------|---------|
|                                                          | R             | p-value | R                  | p-value | R               | p-value |
| <b><math>\omega</math>3 total</b>                        | 0.44          | <0.01   | 0.24               | <0.01   | 0.27            | <0.01   |
| <b>LC<math>\omega</math>3</b>                            | 0.59          | <0.01   | 0.27               | <0.01   | 0.26            | <0.01   |
| <b><math>\omega</math>6 total</b>                        | -0.11         | 0.18    | 0.03               | 0.72    | 0.23            | <0.01   |
| <b>Ratio LC<math>\omega</math>3/<math>\omega</math>6</b> | 0.53          | <0.01   | 0.40               | <0.01   | 0.45            | <0.01   |

**NOTE:** Spearman's correlations were adjusted for age, waist circumference and energy intake.

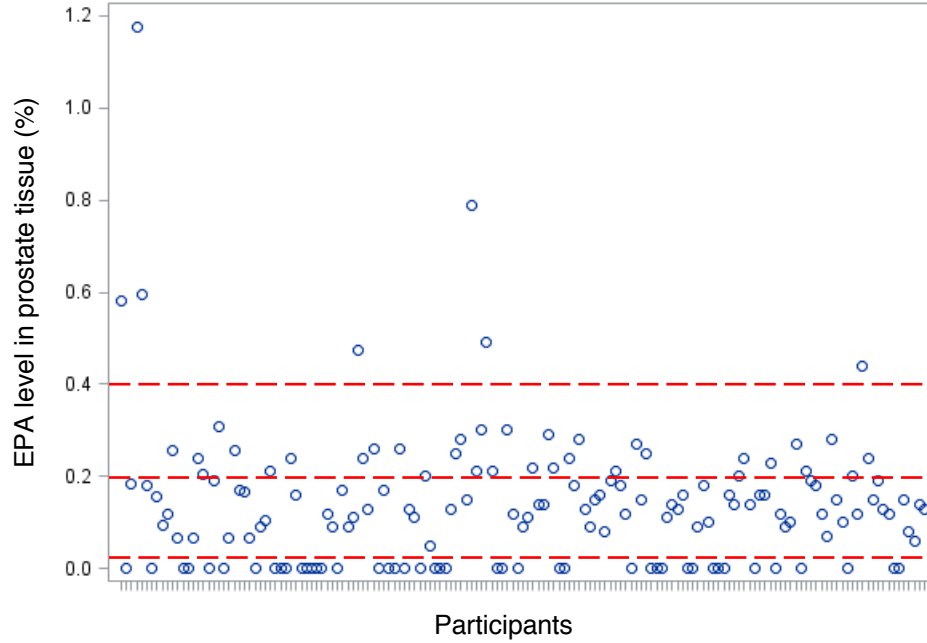

**Figure S1. Distribution of eicosapentaenoic acid (EPA) level in prostate tissue.** The percentage of EPA level from total fatty acids was used to evaluate a dose-response between EPA level and grade of prostate cancer. EPA was categorized based on observed distribution (dashed red lines). Each dot represents one participant.

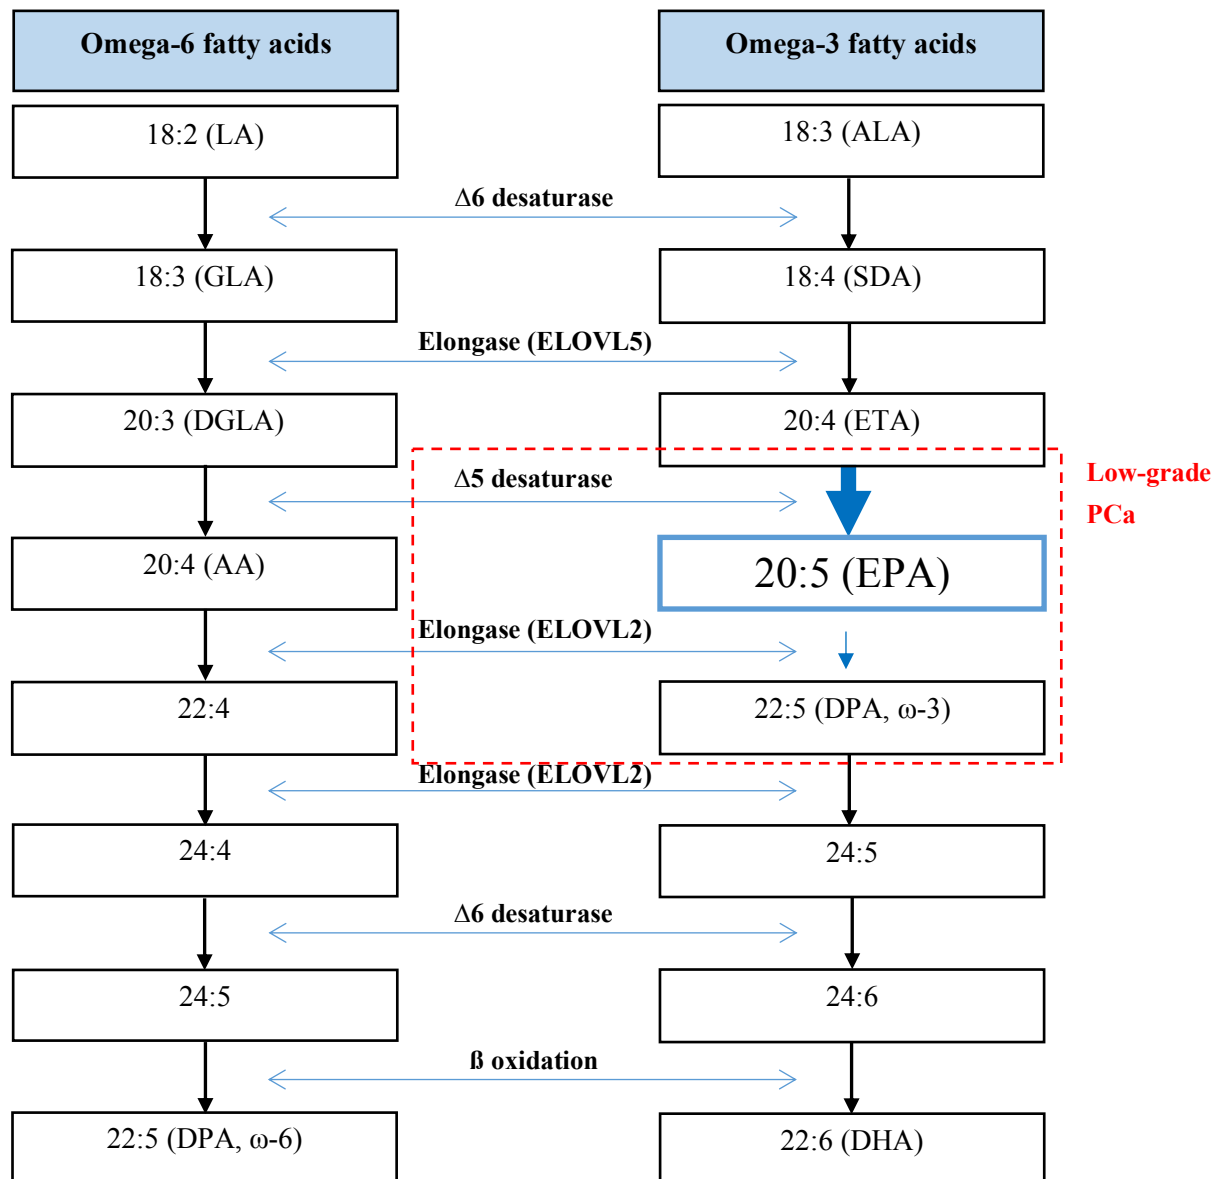

**Figure S2. Schematic representation of long-chain polyunsaturated omega-6 and omega-3 fatty acids metabolism.** Fatty acids and enzymes are indicated on the graph. High ratio of EPA/ETA and low ratio of DPA/EPA in low-grade PCa suggest a bioaccumulation of EPA in prostate tissue (dashed red line). LA: Linoleic acid, GLA: Gamma linolenic acid, DGLA: Dihomo-gamma linolenic acid dihydro-gamma, AA: Arachidonic acid, DPA: Docosapentaenoic acid, ALA: Alpha-linolenic acid, SDA: Stearidonic acid, ETA: Eicosatetraenoic acid, EPA: Eicosapentaenoic acid, DHA: docosahexaenoic acid.
